# Supplementary material for: Aging-Associated Reductions in AMP-Activated Protein Kinase Activity and Mitochondrial Biogenesis
Source: PubMed Central journal article supplement (PMC1885964; doi:10.1016/j.cmet.2007.01.008), 2007-02-07

## Supplemental Data

### Short Article

## Aging-Associated Reductions in AMP-Activated Protein Kinase Activity and Mitochondrial Biogenesis

Richard M. Reznick, Haihong Zong, Ji Li, Katsutaro Morino, Irene K. Moore, Hannah J. Yu, Zhen-Xiang Liu, Jianying Dong, Kirsty J. Mustard, Simon A. Hawley, Douglas Befroy, Marc Pypaert, D. Grahame Hardie, Lawrence H. Young, and Gerald I. Shulman

#### Figure S1.

(A) AMPK- $\alpha_1$  activity in the EDL muscle of young and old rats infused with either AICAR or saline (Control). AMPK- $\alpha_1$  activity was not increased in the young AICAR-treated rats compared to the young saline-treated rats. Additionally, there was no difference between the old AICAR-infused and saline-infused rats. All values are means  $\pm$  SE. (n = 4 in each group.)

(B) AMPK- $\alpha_1$  protein expression in the EDL muscle of young and old rats infused with either AICAR or saline (Control). AMPK- $\alpha_1$  protein expression was not increased in the young AICAR-treated rats compared to the young saline-treated rats. Additionally, there was no difference between the old AICAR-infused and saline-infused rats. All values are means  $\pm$  SE. (n = 4 in each group.)

(C) AMPK- $\alpha_2$  protein expression in the EDL muscle of young and old rats infused with either AICAR or saline (Control). AMPK- $\alpha_2$  protein expression was not increased in the young AICAR-treated rats compared to the young saline-treated rats. Additionally, there was no difference between the old AICAR-infused and saline-infused rats. All values are means  $\pm$  SE. (n = 4 in each group.)

(D) AMPK- $\alpha_1$  activity in the EDL muscle of exercising and sedentary (Control) young and old rats. AMPK- $\alpha_1$  activity was not increased in the young exercising rats compared to the young sedentary rats. Additionally, there was no difference between the old exercising and sedentary rats. All values are means  $\pm$  SE. (n = 4 in each group.)

(E) AMPK- $\alpha_1$  protein expression in the EDL muscle of exercising and sedentary (Control) young and old rats. AMPK- $\alpha_1$  protein expression was not increased in the young exercising rats compared to the young sedentary rats. Additionally, there was no difference between the old exercising and sedentary rats. All values are means  $\pm$  SE. (n = 4 in each group.)

(F) AMPK- $\alpha_2$  protein expression in the EDL muscle of exercising and sedentary (Control) young and old rats. AMPK- $\alpha_2$  protein expression was not increased in the young exercising rats compared to the young sedentary rats. Additionally, there was no difference between the old exercising and sedentary rats. All values are means  $\pm$  SE. (n = 4 in each group.)

**A**

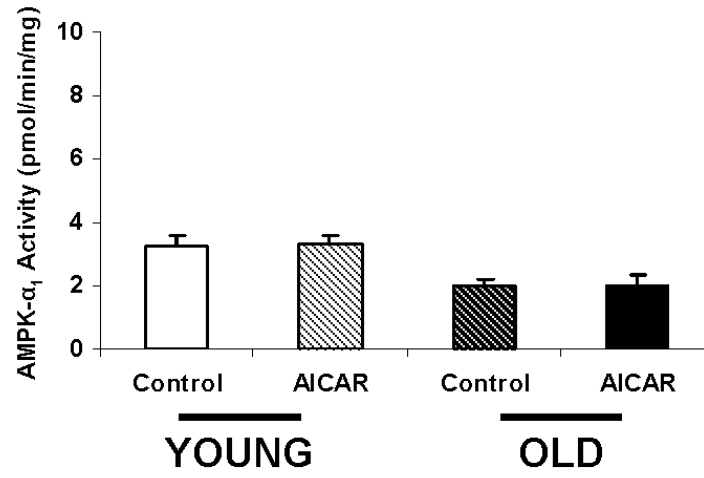

**B**

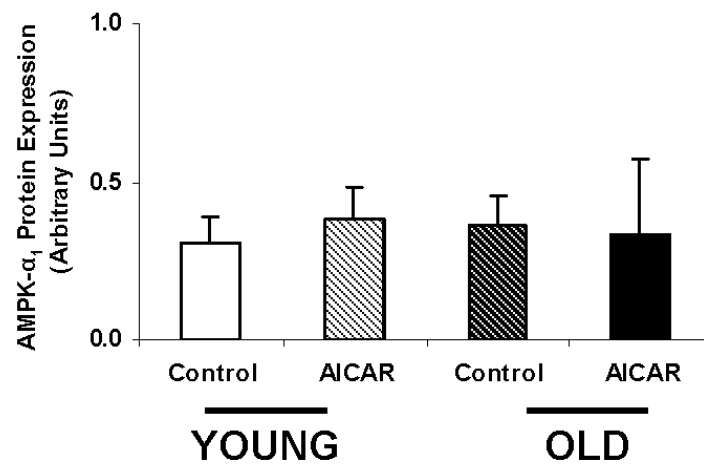

**C**

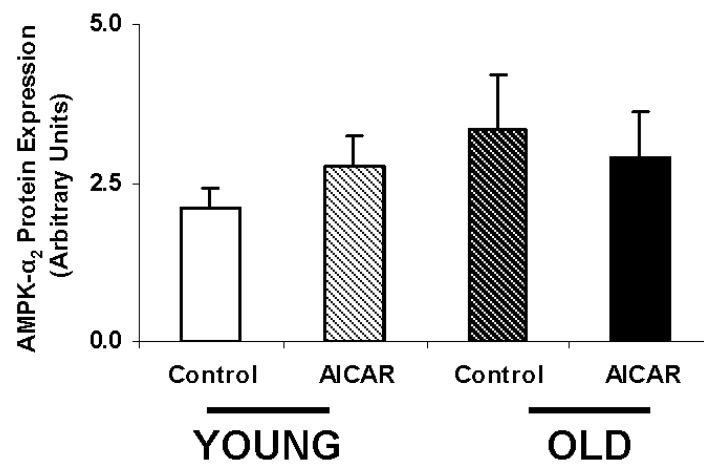

**D**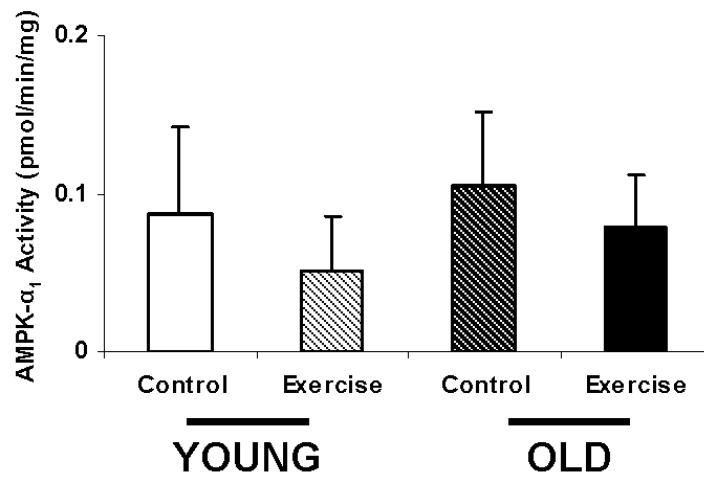**E**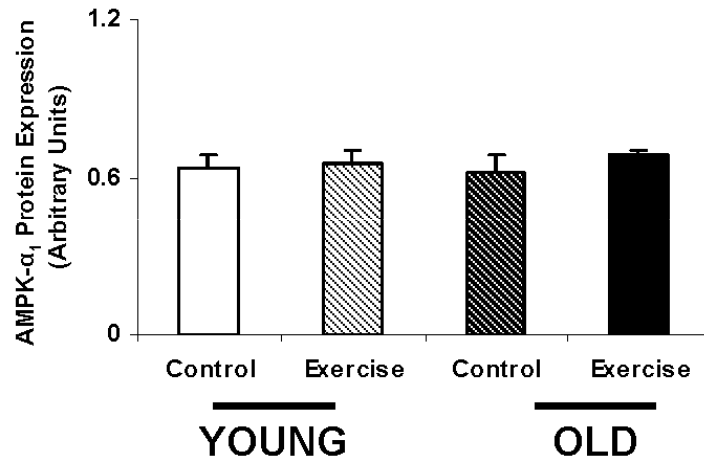**F**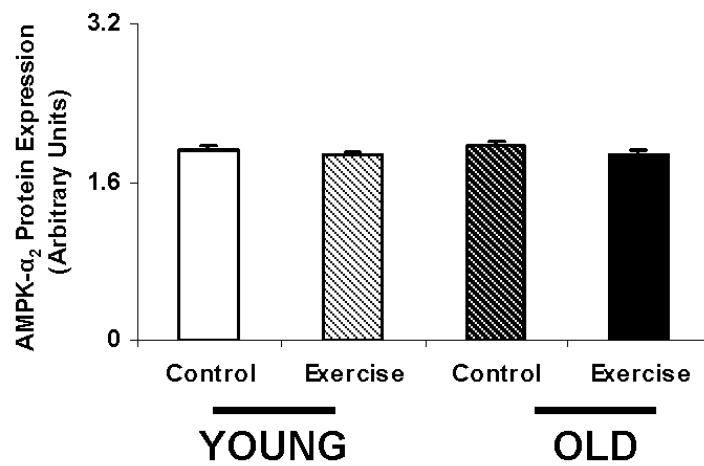

Supplement: mmc1.pdf [file mmc1.pdf]
